# Supplementary material for: Plant Low-Temperature Stress: Signaling and Response
Source: MDPI journal article supplement (doi:10.3390/agronomy12030702), 2022-03-14
Supplement: s1 [file s1]

Supplementary Table S1: Plant microRNAs reported to be regulated by low temperature stress (source PASmiR ; <http://pcsb.ahau.edu.cn:8080/PASmiR/>)

| Sr. No. | Plant species               | miRNA       | miRNA Regulation | Reference                |
|---------|-----------------------------|-------------|------------------|--------------------------|
| 1       | <i>Arabidopsis thaliana</i> | ath-miR159  | up-regulated     | Reyes and Chua (2007)    |
| 2       | <i>Arabidopsis thaliana</i> | ath-miR417  | up-regulated     | (Jung and Kang 2007)     |
| 3       | <i>Arabidopsis thaliana</i> | ath-miR156g | up-regulated     | Lee et al. (2010)        |
| 4       | <i>Arabidopsis thaliana</i> | ath-miR163a | down-regulated   | Lee et al. (2010)        |
| 5       | <i>Arabidopsis thaliana</i> | ath-miR169b | up-regulated     | Lee et al. (2010)        |
| 6       | <i>Arabidopsis thaliana</i> | ath-miR172a | down-regulated   | Lee et al. (2010)        |
| 7       | <i>Arabidopsis thaliana</i> | ath-miR398b | down-regulated   | Lee et al. (2010)        |
| 8       | <i>Arabidopsis thaliana</i> | ath-miR399a | down-regulated   | Lee et al. (2010)        |
| 9       | <i>Arabidopsis thaliana</i> | ath-miR156  | up-regulated     | Zhou et al. (2008)       |
| 10      | <i>Arabidopsis thaliana</i> | ath-miR157  | up-regulated     | Zhou et al. (2008)       |
| 11      | <i>Arabidopsis thaliana</i> | ath-miR164  | up-regulated     | Zhou et al. (2008)       |
| 12      | <i>Arabidopsis thaliana</i> | ath-miR165  | up-regulated     | Zhou et al. (2008)       |
| 13      | <i>Arabidopsis thaliana</i> | ath-miR166  | up-regulated     | Zhou et al. (2008)       |
| 14      | <i>Arabidopsis thaliana</i> | ath-miR169  | up-regulated     | Zhou et al. (2008)       |
| 15      | <i>Arabidopsis thaliana</i> | ath-miR172  | up-regulated     | Zhou et al. (2008)       |
| 16      | <i>Arabidopsis thaliana</i> | ath-miR319  | up-regulated     | Zhou et al. (2008)       |
| 17      | <i>Arabidopsis thaliana</i> | ath-miR393  | up-regulated     | Zhou et al. (2008)       |
| 18      | <i>Arabidopsis thaliana</i> | ath-miR394  | up-regulated     | Zhou et al. (2008)       |
| 19      | <i>Arabidopsis thaliana</i> | ath-miR396  | up-regulated     | Zhou et al. (2008)       |
| 20      | <i>Arabidopsis thaliana</i> | ath-miR397  | up-regulated     | Zhou et al. (2008)       |
| 21      | <i>Arabidopsis thaliana</i> | ath-miR398  | up-regulated     | Zhou et al. (2008)       |
| 22      | <i>Arabidopsis thaliana</i> | ath-miR402  | up-regulated     | Zhou et al. (2008)       |
| 23      | <i>Arabidopsis thaliana</i> | ath-miR157a | down-regulated   | Byun et al. (2009)       |
| 24      | <i>Arabidopsis thaliana</i> | ath-miR162a | down-regulated   | Byun et al. (2009)       |
| 25      | <i>Arabidopsis thaliana</i> | ath-miR163a | up-regulated     | Byun et al. (2009)       |
| 26      | <i>Arabidopsis thaliana</i> | ath-miR166f | down-regulated   | Byun et al. (2009)       |
| 27      | <i>Arabidopsis thaliana</i> | ath-miR167d | down-regulated   | Byun et al. (2009)       |
| 28      | <i>Arabidopsis thaliana</i> | ath-miR319b | down-regulated   | Byun et al. (2009)       |
| 29      | <i>Arabidopsis thaliana</i> | ath-miR393b | down-regulated   | Byun et al. (2009)       |
| 30      | <i>Arabidopsis thaliana</i> | ath-miR394b | up-regulated     | Byun et al. (2009)       |
| 31      | <i>Arabidopsis thaliana</i> | ath-miR165  | up-regulated     | Liu et al. (2008)        |
| 32      | <i>Arabidopsis thaliana</i> | ath-miR168  | up-regulated     | Liu et al. (2008)        |
| 33      | <i>Arabidopsis thaliana</i> | ath-miR169  | up-regulated     | Liu et al. (2008)        |
| 34      | <i>Arabidopsis thaliana</i> | ath-miR171  | up-regulated     | Liu et al. (2008)        |
| 35      | <i>Arabidopsis thaliana</i> | ath-miR172  | up-regulated     | Liu et al. (2008)        |
| 36      | <i>Arabidopsis thaliana</i> | ath-miR319  | up-regulated     | Liu et al. (2008)        |
| 37      | <i>Arabidopsis thaliana</i> | ath-miR393  | up-regulated     | Liu et al. (2008)        |
| 38      | <i>Arabidopsis thaliana</i> | ath-miR396  | up-regulated     | Liu et al. (2008)        |
| 39      | <i>Arabidopsis thaliana</i> | ath-miR397  | up-regulated     | Liu et al. (2008)        |
| 40      | <i>Arabidopsis thaliana</i> | ath-miR408  | up-regulated     | Liu et al. (2008)        |
| 41      | <i>Arabidopsis thaliana</i> | ath-miR319c | up-regulated     | Sunkar and Zhu (2004)    |
| 42      | <i>Arabidopsis thaliana</i> | ath-miR393  | up-regulated     | Sunkar and Zhu (2004)    |
| 43      | <i>Arabidopsis thaliana</i> | ath-miR156  | up-regulated     | Kim et al. (2011)        |
| 44      | <i>Arabidopsis thaliana</i> | ath-miR399b | up-regulated     | Kim et al. (2011)        |
| 45      | <i>Arabidopsis thaliana</i> | ath-miR399  | up-regulated     | Tang et al. (2012)       |
| 46      | <i>B. distachyon</i>        | bdi-miR172  | up-regulated     | Zhang et al. (2009)      |
| 47      | <i>B. distachyon</i>        | bdi-miR397  | up-regulated     | Zhang et al. (2009)      |
| 48      | <i>Helianthus annuus</i>    | han-miR396  | up-regulated     | Giacomelli et al. (2012) |
| 49      | <i>Oryza sativa</i>         | osa-miR156  | down-regulated   | Shen et al. (2010)       |

|     |                               |              |                |                                |
|-----|-------------------------------|--------------|----------------|--------------------------------|
| 50  | <i>Oryza sativa</i>           | osa-miR167   | down-regulated | Shen et al. (2010)             |
| 51  | <i>Oryza sativa</i>           | osa-miR169   | down-regulated | Shen et al. (2010)             |
| 52  | <i>Oryza sativa</i>           | osa-miR319   | down-regulated | Shen et al. (2010)             |
| 53  | <i>Oryza sativa</i>           | osa-miR1866  | down-regulated | Barrera-Figueroa et al. (2012) |
| 54  | <i>Oryza sativa</i>           | osa-miR1867  | down-regulated | Barrera-Figueroa et al. (2012) |
| 55  | <i>Oryza sativa</i>           | osa-miR2275d | up-regulated   | Barrera-Figueroa et al. (2012) |
| 56  | <i>Oryza sativa</i>           | osa-miR394   | up-regulated   | Barrera-Figueroa et al. (2012) |
| 57  | <i>Oryza sativa</i>           | osa-miR396c  | up-regulated   | Barrera-Figueroa et al. (2012) |
| 58  | <i>Oryza sativa</i>           | osa-miR393   | up-regulated   | Xia et al. (2012)              |
| 59  | <i>Oryza sativa</i>           | osa-miR1320  | down-regulated | Lv et al. (2010)               |
| 60  | <i>Oryza sativa</i>           | osa-miR1435  | up-regulated   | Lv et al. (2010)               |
| 61  | <i>Oryza sativa</i>           | osa-miR156   | down-regulated | Lv et al. (2010)               |
| 62  | <i>Oryza sativa</i>           | osa-miR166k  | up-regulated   | Lv et al. (2010)               |
| 63  | <i>Oryza sativa</i>           | osa-miR166m  | up-regulated   | Lv et al. (2010)               |
| 64  | <i>Oryza sativa</i>           | osa-miR167   | down-regulated | Lv et al. (2010)               |
| 65  | <i>Oryza sativa</i>           | osa-miR168   | down-regulated | Lv et al. (2010)               |
| 66  | <i>Oryza sativa</i>           | osa-miR169   | down-regulated | Lv et al. (2010)               |
| 67  | <i>Oryza sativa</i>           | osa-miR171   | down-regulated | Lv et al. (2010)               |
| 68  | <i>Oryza sativa</i>           | osa-miR1850  | up-regulated   | Lv et al. (2010)               |
| 69  | <i>Oryza sativa</i>           | osa-miR1868  | up-regulated   | Lv et al. (2010)               |
| 70  | <i>Oryza sativa</i>           | osa-miR1876  | down-regulated | Lv et al. (2010)               |
| 71  | <i>Oryza sativa</i>           | osa-miR1884  | down-regulated | Lv et al. (2010)               |
| 72  | <i>Oryza sativa</i>           | osa-miR319   | down-regulated | Lv et al. (2010)               |
| 73  | <i>Oryza sativa</i>           | osa-miR444   | down-regulated | Lv et al. (2010)               |
| 74  | <i>Oryza sativa</i>           | osa-miR535   | up-regulated   | Lv et al. (2010)               |
| 75  | <i>Phalaenopsis aphrodite</i> | pap-miR156   | up-regulated   | An et al. (2011)               |
| 76  | <i>Phalaenopsis aphrodite</i> | pap-miR162   | up-regulated   | An et al. (2011)               |
| 77  | <i>Phalaenopsis aphrodite</i> | pap-miR168   | up-regulated   | An et al. (2011)               |
| 78  | <i>Phalaenopsis aphrodite</i> | pap-miR396   | up-regulated   | An et al. (2011)               |
| 79  | <i>Phalaenopsis aphrodite</i> | pap-miR528   | up-regulated   | An et al. (2011)               |
| 80  | <i>Phalaenopsis aphrodite</i> | pap-miR535   | up-regulated   | An et al. (2011)               |
| 81  | <i>Phalaenopsis aphrodite</i> | pap-miR894   | up-regulated   | An et al. (2011)               |
| 82  | <i>Phaseolus vulgaris</i>     | pvu-miR2118  | up-regulated   | Arenas-Huertero et al. (2009)  |
| 83  | <i>Populus tomentosa</i>      | pto-miR1450  | up-regulated   | Chen et al. (2012)             |
| 84  | <i>Populus tomentosa</i>      | pto-miR167   | up-regulated   | Chen et al. (2012)             |
| 85  | <i>Populus tomentosa</i>      | pto-miR169   | down-regulated | Chen et al. (2012)             |
| 86  | <i>Populus tomentosa</i>      | pto-miR171   | up-regulated   | Chen et al. (2012)             |
| 87  | <i>Populus tomentosa</i>      | pto-miR319   | down-regulated | Chen et al. (2012)             |
| 88  | <i>Populus tomentosa</i>      | pto-miR395   | down-regulated | Chen et al. (2012)             |
| 89  | <i>Populus trichocarpa</i>    | ptc-miR156   | down-regulated | Lu et al. (2008)               |
| 90  | <i>Populus trichocarpa</i>    | ptc-miR160   | up-regulated   | v                              |
| 91  | <i>Populus trichocarpa</i>    | ptc-miR164   | up-regulated   | Lu et al. (2008)               |
| 92  | <i>Populus trichocarpa</i>    | ptc-miR168a  | up-regulated   | Lu et al. (2008)               |
| 93  | <i>Populus trichocarpa</i>    | ptc-miR168b  | up-regulated   | Lu et al. (2008)               |
| 94  | <i>Populus trichocarpa</i>    | ptc-miR169   | up-regulated   | Lu et al. (2008)               |
| 95  | <i>Populus trichocarpa</i>    | ptc-miR390   | up-regulated   | Lu et al. (2008)               |
| 96  | <i>Populus trichocarpa</i>    | ptc-miR393   | up-regulated   | Lu et al. (2008)               |
| 97  | <i>Populus trichocarpa</i>    | ptc-miR394a  | up-regulated   | Lu et al. (2008)               |
| 98  | <i>Populus trichocarpa</i>    | ptc-miR394b  | up-regulated   | Lu et al. (2008)               |
| 99  | <i>Populus trichocarpa</i>    | ptc-miR395b  | up-regulated   | Lu et al. (2008)               |
| 100 | <i>Populus trichocarpa</i>    | ptc-miR396f  | up-regulated   | Lu et al. (2008)               |
| 101 | <i>Populus trichocarpa</i>    | ptc-miR474b  | up-regulated   | Lu et al. (2008)               |
| 102 | <i>Populus trichocarpa</i>    | ptc-miR474c  | up-regulated   | Lu et al. (2008)               |

|     |                            |             |                |                        |
|-----|----------------------------|-------------|----------------|------------------------|
| 103 | <i>Populus trichocarpa</i> | ptc-miR475a | up-regulated   | Lu et al. (2008)       |
| 104 | <i>Populus trichocarpa</i> | ptc-miR475b | up-regulated   | Lu et al. (2008)       |
| 105 | <i>Populus trichocarpa</i> | ptc-miR476a | up-regulated   | Lu et al. (2008)       |
| 106 | <i>Populus trichocarpa</i> | ptc-miR477a | up-regulated   | Lu et al. (2008)       |
| 107 | <i>Populus trichocarpa</i> | ptc-miR477b | up-regulated   | Lu et al. (2008)       |
| 108 | <i>Prunus persica</i>      | ppe-miR156  | up-regulated   | Barakat et al. (2012)  |
| 109 | <i>Prunus persica</i>      | ppe-miR159  | up-regulated   | Barakat et al. (2012)  |
| 110 | <i>Prunus persica</i>      | ppe-miR166  | up-regulated   | Barakat et al. (2012)  |
| 111 | <i>Prunus persica</i>      | ppe-miR172  | up-regulated   | Barakat et al. (2012)  |
| 112 | <i>Prunus persica</i>      | ppe-miR390  | up-regulated   | Barakat et al. (2012)  |
| 113 | <i>Prunus persica</i>      | ppe-miR396  | up-regulated   | Barakat et al. (2012)  |
| 114 | <i>Saccharum spp</i>       | spp-miR319  | up-regulated   | Thiebaut et al. (2012) |
| 115 | <i>Triticum aestivum</i>   | tae-miR167c | up-regulated   | Tang et al. (2012)     |
| 116 | <i>Triticum aestivum</i>   | tae-miR167d | up-regulated   | Tang et al. (2012)     |
| 117 | <i>Triticum aestivum</i>   | tae-miR167e | up-regulated   | Tang et al. (2012)     |
| 118 | <i>Triticum aestivum</i>   | tae-miR172a | down-regulated | Tang et al. (2012)     |
| 119 | <i>Triticum aestivum</i>   | tae-miR393  | down-regulated | Tang et al. (2012)     |
| 120 | <i>Triticum aestivum</i>   | tae-miR396a | down-regulated | Tang et al. (2012)     |
| 121 | <i>Triticum aestivum</i>   | tae-miR444c | down-regulated | Tang et al. (2012)     |

#### Supplementary References:

- An FM, Hsiao SR, Chan MT (2011) Sequencing-based approaches reveal low ambient temperature-responsive and tissue-specific microRNAs in phalaenopsis orchid. PLoS One 6 (5):e18937. doi:10.1371/journal.pone.0018937
- Arenas-Huertero C, Pérez B, Rabanal F, Blanco-Melo D, De la Rosa C, Estrada-Navarrete G, Sanchez F, Covarrubias AA, Reyes JL (2009) Conserved and novel miRNAs in the legume Phaseolus vulgaris in response to stress. Plant Mol Biol 70 (4):385-401. doi:10.1007/s11103-009-9480-3
- Barakat A, Sriram A, Park J, Zhebentyayeva T, Main D, Abbott A (2012) Genome wide identification of chilling responsive microRNAs in Prunus persica. BMC Genomics 13:481. doi:10.1186/1471-2164-13-481
- Barrera-Figueroa BE, Gao L, Wu Z, Zhou X, Zhu J, Jin H, Liu R, Zhu JK (2012) High throughput sequencing reveals novel and abiotic stress-regulated microRNAs in the inflorescences of rice. BMC Plant Biol 12:132. doi:10.1186/1471-2229-12-132
- Byun YJ, Kim HJ, Lee DH (2009) LongSAGE analysis of the early response to cold stress in Arabidopsis leaf. Planta 229 (6):1181-1200. doi:10.1007/s00425-009-0903-9
- Chen L, Zhang Y, Ren Y, Xu J, Zhang Z, Wang Y (2012) Genome-wide identification of cold-responsive and new microRNAs in Populus tomentosa by high-throughput sequencing. Biochem Biophys Res Commun 417 (2):892-896. doi:10.1016/j.bbrc.2011.12.070

- Giacomelli JJ, Weigel D, Chan RL, Manavella PA (2012) Role of recently evolved miRNA regulation of sunflower HaWRKY6 in response to temperature damage. *New Phytol* 195 (4):766-773. doi:10.1111/j.1469-8137.2012.04259.x
- Jung HJ, Kang H (2007) Expression and functional analyses of microRNA417 in *Arabidopsis thaliana* under stress conditions. *Plant Physiol Biochem* 45 (10-11):805-811. doi:10.1016/j.plaphy.2007.07.015
- Kim W, Ahn HJ, Chiou TJ, Ahn JH (2011) The role of the miR399-PHO2 module in the regulation of flowering time in response to different ambient temperatures in *Arabidopsis thaliana*. *Mol Cells* 32 (1):83-88. doi:10.1007/s10059-011-1043-1
- Lee H, Yoo SJ, Lee JH, Kim W, Yoo SK, Fitzgerald H, Carrington JC, Ahn JH (2010) Genetic framework for flowering-time regulation by ambient temperature-responsive miRNAs in *Arabidopsis*. *Nucleic Acids Res* 38 (9):3081-3093. doi:10.1093/nar/gkp1240
- Liu HH, Tian X, Li YJ, Wu CA, Zheng CC (2008) Microarray-based analysis of stress-regulated microRNAs in *Arabidopsis thaliana*. *RNA* 14 (5):836-843. doi:10.1261/rna.895308
- Lu S, Sun YH, Chiang VL (2008) Stress-responsive microRNAs in *Populus*. *Plant J* 55 (1):131-151. doi:10.1111/j.1365-313X.2008.03497.x
- Lv DK, Bai X, Li Y, Ding XD, Ge Y, Cai H, Ji W, Wu N, Zhu YM (2010) Profiling of cold-stress-responsive miRNAs in rice by microarrays. *Gene* 459 (1-2):39-47. doi:10.1016/j.gene.2010.03.011
- Reyes JL, Chua NH (2007) ABA induction of miR159 controls transcript levels of two MYB factors during *Arabidopsis* seed germination. *Plant J* 49 (4):592-606. doi:10.1111/j.1365-313X.2006.02980.x
- Shen J, Xie K, Xiong L (2010) Global expression profiling of rice microRNAs by one-tube stem-loop reverse transcription quantitative PCR revealed important roles of microRNAs in abiotic stress responses. *Mol Genet Genomics* 284 (6):477-488. doi:10.1007/s00438-010-0581-0
- Sunkar R, Zhu JK (2004) Novel and stress-regulated microRNAs and other small RNAs from *Arabidopsis*. *Plant Cell* 16 (8):2001-2019. doi:10.1105/tpc.104.022830
- Tang Z, Zhang L, Xu C, Yuan S, Zhang F, Zheng Y, Zhao C (2012) Uncovering small RNA-mediated responses to cold stress in a wheat thermosensitive genic male-sterile line by deep sequencing. *Plant Physiol* 159 (2):721-738. doi:10.1104/pp.112.196048
- Thiebaut F, Rojas CA, Almeida KL, Grativol C, Domiciano GC, Lamb CR, Engler JA, Hemery AS, Ferreira PC (2012) Regulation of miR319 during cold stress in sugarcane. *Plant Cell Environ* 35 (3):502-512. doi:10.1111/j.1365-3040.2011.02430.x

- Xia K, Wang R, Ou X, Fang Z, Tian C, Duan J, Wang Y, Zhang M (2012) OsTIR1 and OsAFB2 downregulation via OsmiR393 overexpression leads to more tillers, early flowering and less tolerance to salt and drought in rice. *PLoS One* 7 (1):e30039. doi:10.1371/journal.pone.0030039
- Zhang J, Xu Y, Huan Q, Chong K (2009) Deep sequencing of Brachypodium small RNAs at the global genome level identifies microRNAs involved in cold stress response. *BMC Genomics* 10:449. doi:10.1186/1471-2164-10-449
- Zhou X, Wang G, Sutoh K, Zhu JK, Zhang W (2008) Identification of cold-inducible microRNAs in plants by transcriptome analysis. *Biochim Biophys Acta* 1779 (11):780-788. doi:10.1016/j.bbagr.2008.04.005
